1 **The Gut Microbiota composition of Feral and Tamworth Pigs determined using High-Throughput**  
2 **Culturomics and Metagenomics Reveals Compositional Variations When Compared to the**  
3 **Commercial Breeds.**

4

5

6 Gavin J. Fenske<sup>1,2</sup>, Sudeep Ghimire<sup>1,2</sup>, Linto Antony<sup>1,2</sup>, Jane Christopher-Hennings<sup>1,2</sup>, and Joy  
7 Scaria<sup>1,2\*</sup>

8

9 <sup>1</sup> Department of Veterinary and Biomedical Sciences, South Dakota State University, Brookings  
10 SD 57007, USA

11 <sup>2</sup>South Dakota Center for Biologics Research and Commercialization, SD, USA.

12

13 \*Corresponding Author: Joy.Scaria@sdstate.edu

14

15

16

17

18

19

20

## 21 **Abstract**

22 Bacterial communities in the hindguts of pigs have a profound impact on health and disease. Yet  
23 very limited studies have been performed outside intensive swine farms to determine pig gut  
24 microbiome composition in natural populations. Feral pigs represent a unique situation where the  
25 microbiome structure can be observed outside the realm of modern agriculture. Additionally,  
26 Tamworth pigs that freely forage were included to characterize the microbiome structure of this  
27 rare breed. In this study, gut microbiome of feral and Tamworth pigs were determined using  
28 metagenomics and culturomics. Tamworth pigs are highly dominated by Bacteroidetes primarily  
29 composed of the genus *Prevotella* whereas feral samples were more diverse with almost equal  
30 proportions of Firmicutes and Bacteroidetes. In total, 46 distinct species were successfully  
31 isolated from 1000 colonies selected. The combination of metagenomics and culture techniques  
32 facilitated a greater retrieval of annotated genes than either method alone. Furthermore, the  
33 naturally raised Tamworth pig microbiome contained a higher number of antibiotic resistance  
34 genes when compared to the feral pig microbiome. The single medium based pig microbiota  
35 library we report is a resource to better understand pig gut microbial ecology and function by  
36 assembling simple to complex microbiota communities in bioreactors or germfree animal  
37 models.

38

39

40

41

42

## 43 **Introduction**

44           The microbiome in the hindgut of mammals has been associated with feed conversion  
45 efficiency (Singh, et al. 2014: 145-54), pathogen exclusion (Piewngam, et al. 2018: 532-7), and  
46 the production of metabolites that directly influence host signaling pathways (Byndloss, et al.  
47 2017: 570-5). It has become clear in recent years, that the microbiome has a drastic impact on  
48 host health. Many current methods to study the swine microbiome, are based upon dietary  
49 intervention (Hedegaard, et al. 2016: e0147373, Metzler-Zebeli, et al. 2015: 8489). That is, a  
50 dietary substrate is introduced to the animal and an effect on microbiome composition, typically  
51 16s rRNA analysis, is measured. Within the swine industry, there is an upswell of work devoted  
52 to increasing feed conversion rate ; feed alone accounts for nearly 60% of production costs  
53 (Jing, et al. 2015: 11953). While focusing on feed conversion efficiency makes economic sense,  
54 the process disregards the biological factors that shaped hindgut evolution, and thus the evolution  
55 of the microbiome in pigs. This would be similar to sampling traditional hunter-gatherers which  
56 has provided insight into the microbiome of humans outside the realms of modern dietary  
57 practices (Smits, et al. 2017: 802). Feral pigs in the American South and Tamworth pigs which  
58 are raised as “natural foragers” may provide models of the pig microbiome outside the realm of  
59 modern agricultural processes.

60           Currently there are an estimated 6 million feral pigs in the United States (USDA 2018).  
61   Feral pigs were first introduced in the early 1500s by Spanish settlers and cause significant  
62   ecological damage. It has been shown that feral pigs decrease the amount of plant litter and cover  
63   in areas where they feed (Siemann, et al. 2009: 546-53). Yet, with the ecological and economic  
64   toll feral pigs exert, little study has been conducted to elucidate the structure of their  
65   microbiome. Here, we used feral pigs as a case study to compare against Tamworth breed pigs.  
66   The Tamworth breed is thought to be descended from the Old English Forest pig and has not  
67   been crossed or improved with other breeds since the late 18<sup>th</sup> Century (British Pig Association  
68   n.d.). The breed is not a traditional animal used in high production agriculture, bred instead for  
69   its tolerance to cold weather and ability to forage. Given Tamworth's unique heritage, close  
70   relation to an indigenous pig species in the British Isles, and dietary habits closely matching wild  
71   pigs, we chose to include them as another model of the pig microbiome outside of the influence  
72   of modern agriculture. Additionally, the Tamworth breed is under watch by the Livestock  
73   Conservancy, after previously being designated as threatened, and the microbiome composition  
74   has yet to be characterized.

75           Here we attempt to characterize the microbiomes of Tamworth and feral pigs using  
76   metagenomic sequencing and high throughput culturomics on direct colon and cecum contents.  
77   To date, modern culturomic efforts have been reserved almost exclusively to human fecal  
78   samples and we look to extend such methodology to pigs. The culture strategy employs a single

79 medium with various selection screens to shift the taxa retrieved. A single medium isolation  
80 strategy will facilitate downstream defined community studies. For example, simple to complex  
81 bacterial communities can be assembled in bioreactors to study the mechanistics of pig gut  
82 microbiome succession(Auchtung, et al. 2015: 42). Similiarly, colonization of such defined  
83 communities constituted from a well characterized gut microbiome library could reveal how gut  
84 bacterial species or combinations impact gut development and immunity(Goodman, et al. 2011:  
85 6252-7). We further characterized the representiative species genomes from our library by whole  
86 genome sequencing. Availability of a well characterized strain library with genome information  
87 will facilitate future studies to better understand the role of pig gut microbiome in health and  
88 disease.

## 89 **Materials and Methods**

### 90 **Sample Collection and Preparation**

91 Permission was granted from purchasers of three Tamworth pigs to obtain colon and cecum  
92 samples immediately following slaughter. The pigs were raised and housed in the upper North  
93 Plains of the United States. Small incisions were made into either the colon or cecum with a  
94 sterile disposable scalpel. Lumen contents were gently squeezed into sterile 50 mL tubes, mixed  
95 with an equal proportion of 40% anaerobic glycerol (final concentration 20% anaerobic  
96 glycerol), and immediately snap frozen in liquid nitrogen. For culture preparation, samples were  
97 pooled under anaerobic conditions in a vinyl chamber (Coy Labs, USA). Feral samples from four  
98 animals were kindly provided by boar hunters in Texas, US. A similar procedure was followed

99 where colon and cecum samples were taken immediately following evisceration, mixed with  
100 anaerobic glycerol and frozen.

### 101 **Metagenomics**

102 DNA was extracted from gut samples using the DNeasy PowerSoil kit (Qiagen, Germany)  
103 following the provided kit protocol. After extraction, Microbial DNA was enriched with the  
104 NEBNext<sup>®</sup> Microbiome DNA Enrichment Kit (New England Biolabs, US) to remove host DNA  
105 present after DNA extraction. Metagenomic sequencing was conducted on the Illumina MiSeq  
106 platform utilizing V2 (250 bp) paired-end sequencing chemistry. Raw sequencing reads were  
107 quality controlled using the read-qc module in the software pipeline metaWRAP (Uritskiy, et al.  
108 2018: 158). Briefly, reads are trimmed to PHRED score of > 20 and host reads not removed by  
109 enrichment were removed by read-mapping against a reference pig genome  
110 (GCF\_000003025.6). Resultant reads from read-qc are hereby referred to as high-quality reads.  
111 High-quality reads were passed to Kaiju (Menzel, et al. 2016: 11257) for taxonomy annotation  
112 against the proGenomes database (<http://progenomes.embl.de/>, downloaded March 1, 2019).  
113 Kaiju was run in default greedy mode and resultant annotation files were parsed in R (R Core  
114 Team 2019). Mash (Ondov, et al. 2016: 132) was run to estimate the Jaccard distance between  
115 samples. 10,000 sketches were generated for each sample and the sketches were compared using  
116 the *dist* function provided in the Mash software.

117 Antimicrobial resistance (AMR) genes were predicted from metagenomics assemblies.  
118 High-quality sequencing reads were assembled into contigs using the assembly module in  
119 metaWRAP ; metaSPAdes (Nurk, et al. 2017: 824-34) was the chosen to assemble the reads:  
120 contigs greater than 1,000 bp were retained. Prodigal (Hyatt, et al. 2010: 119-) was run to predict  
121 open reading frames (ORF) using the metagenomic training set. Abricate (Seemann 2018) was

122 then run to annotate the ORF against the NCBI Bacterial Antimicrobial Resistance Reference  
123 Gene Database (<https://www.ncbi.nlm.nih.gov/bioproject/PRJNA313047>, downloaded April 22,  
124 2019).

125 Contigs were gathered into bins using three methods: MetaBAT2 (Kang, et al. 2019:  
126 e27522v1), MaxBin2 (Wu, et al. 2016: 605-7), and CONCOCT (Alneberg, et al. 2014: 1144).  
127 Contig bins were kept if the contamination was less than 5% and bin completeness was greater  
128 than 85% as determined by CheckM (Parks, et al. 2015: 1043-55). Bins from the three methods  
129 used were refined into a coherent bin set using the bin\_refinement module in metaWRAP.  
130 Refined bins were reassembled with a minimum contig length of 200 bp and the same  
131 contamination and completeness parameters as initial bin construction. Metagenomic bin and  
132 pure isolate phylogeny was generated using UBCG (Na, et al. 2018: 280-5) to identify and align  
133 92 marker genes. Tree construction was conducted using RAxML (Stamatakis 2014: 1312-3) :  
134 GTR+G4 nucleotide model. To identify KEGG homologues, ORF were identified in  
135 metagenomic assemblies, bins, and culture genomes using Prodigal. The resultant ORF were  
136 annotated against the KEGG database using KofamKOALA (Aramaki, et al. 2019: 602110) run  
137 locally.

### 138 **Culturomics**

139 Colon and cecum samples were pooled respective to feral and Tamworth samples before culture  
140 experiments. All culture experiments, including pooling, were conducted under anaerobic  
141 conditions inside an anaerobic chamber (Coy Labs, USA). Samples were serially diluted in  
142 sterile anaerobic PBS and spread plated onto the media conditions listed in supplemental table 1.  
143 Plates were inoculated at 37°C for 48 hours before initial colony selection. 25 colonies were non-  
144 selectively sub-cultured from the initial plate to y?BHI plates. The procedure was repeated after

145 72 hours for a total of 50 colonies per media condition. Colonies were primarily identified using  
146 MALDI-TOF (Bruker, Germany). MALDI-TOF scores greater than 2.0 were considered a  
147 positive species identification. Scores between 1.7 - 2.0 were taken as positive genus  
148 identification. Colonies without a positive MALDI-TOF identification were identified by  
149 sequencing the 16s rRNA gene. Briefly, DNA was extracted from colonies using the DNeasy  
150 Blood and Tissue Kit (Qiagen, Germany) following the manufacturer's protocol. 16s rRNA  
151 sequence was amplified using 27F and 805R primers. The primer sequence is listed in  
152 supplemental table 1. Genomes of the selected strains were sequenced on the MiSeq platform  
153 utilizing paired-end v3 chemistry (300 bp). Sequencing reads from individual strains were  
154 assembled with Unicycler (Wick, et al. 2017: e1005595) : minimum contig length of 200 bp. The  
155 raw sequencing reads from the culture isolates and metagenomic samples are hosted at NCBI  
156 under the BioProject ID PRJNA555322.

## 157 **Results**

### 158 **Tamworth and feral pigs harbor distinct microbiotas**

159 We chose to examine Tamworth breed and feral pigs as their lifestyles differ from traditionally  
160 raised agricultural breeds. The Tamworth pigs sampled here were not given any antibiotics or  
161 growth promoters and could freely graze. We hypothesized that such raising would cultivate a  
162 microbiota that would be different to that of swine raised in intensive hog farms. To begin the  
163 investigation, colon and cecum samples were metagenomically sequenced from both breeds.  
164 Figure one shows the taxonomic annotation of the metagenomic reads respective to the source of  
165 isolation. Contradicting our hypothesis that Feral and Tamworth pigs would harbor similar  
166 microbiomes, Feral and Tamworth pigs have inverse Bacteroidetes to Firmicutes compositions.  
167 The phylum Bacteroidetes represents nearly 53% of all classified reads in Tamworth pigs



168 compared to 29% in feral pigs. The abundance of Firmicutes in Tamworth samples is lower than  
169 feral samples at 15% and 28% respectively. Additionally, nearly 10% more of the feral reads  
170 were unclassified compared to Tamworth (37%, 28%, respectively) indicating more of the  
171 diversity in feral pigs is not yet known in the proGenomes database. Turning to the genus level,  
172 the large increase of Bacteroidetes in Tamworth pigs is primarily composed of the genus  
173 *Prevotella*, Figure 1 (B) (38%, feral 11%). Remarkably, the genus *Bacteroides* showed almost  
174 identical distribution between the feral and Tamworth pigs (7.6% and 7.6% respectively). The  
175 increase of Firmicutes in feral samples is due to an increase in several genera such as  
176 *Ruminococcus*, *Clostridium*, and *Eubacterium* corresponding with significantly higher Shannon  
177 diversity index values compared to Tamworth ( $p = 0.0024$ , Wilcoxon rank-sum test). Full  
178 phylum and genus annotation tables are provided in supplemental table 2.

179 To better understand the distance within a sample source, Tamworth vs. Tamworth, and  
180 the difference between sources, Tamworth vs. feral, two clustering methods were employed.  
181 First, Mash (Ondov, et al. 2016: 132) was used to sketch the reads sets and compile a distance  
182 matrix (Figure 1C). Within the matrix, both Kmeans clustering and hierarchical clustering  
183 (average-linkage) separate the samples into Tamworth and feral clades. Mash provides a method  
184 to compare metagenomes that is not subject to annotation bias. Principal component analysis  
185 (PCA) of the OTU tables was the second method employed. Again, two distinct groups of  
186 Tamworth and feral samples are seen in the plot (figure 1D). Interestingly, the Tamworth  
187 samples are more homogenous in both the Mash and PCA methods. All pigs were taken from the  
188 same farm and this may account for the lower inter-animal microbiome divergence. Thus, the  
189 Tamworth and feral pigs examined here harbor distinct microbiotas. Tamworth samples are  
190 dominated by the phylum Bacteroidetes, which in turn is largely comprised of *Prevotella*. Feral

191 samples show a much more even distribution of Firmicutes and Bacteroidetes and are more  
192 diverse in general.

193 Stated earlier, Tamworth pigs sampled were not given antibiotics in feed nor given any  
194 growth promoters. We hypothesized that the lack of antimicrobial agents would correspond to a  
195 relatively low number of AMR homologues in the Tamworth microbiota. Additionally, as feral  
196 animals (we presume) do not uptake antimicrobials, their AMR number would be low as well.  
197 Confoundingly, Tamworth pigs' microbiomes contain at least eight AMR homologues.  
198 Additionally, all Tamworth samples yield more AMR homologues than feral samples (figure 2).  
199 All Tamworth samples contain four putative AMR genes: *cfxA*, *lnu(AN2)*, *mef(En2)*, and *tet(40)*.  
200 No common pattern is apparent for Feral samples; *tet(Q)* is found in 5 of 9 feral samples. Thus,  
201 in microbiome composition and AMR presence Tamworth pigs do not mirror feral pigs in  
202 microbiome composition nor structure.

### 203 **Selective screens shift plating diversity**

204 High throughput culturomics was the second method employed to sample the two  
205 microbiomes. We chose culture sampling, in addition to sequencing methods, as we believed that  
206 many low abundance taxa could be retrieved through culture methods that would be lost in  
207 metagenomics. Also, the generation of a culture library enables defined community experiments  
208 in the future. The culture sampling strategy utilized is as follows: a base medium (yBHI, or close  
209 derivatives) had various selective screens (antibiotics, heat, bile, etc.,) applied to it. A finite  
210 growing surface is available for colonization and some species will grow more rapidly and  
211 subsequently outcompete others. If appropriate selective pressure is applied, we hypothesized  
212 that interspecies selection would decrease allowing for taxa not retrieved in plain medium  
213 conditions to grow. The approach is similar to one previously used to culture strains from human

214 fecal samples (Rettedal, et al. 2014: 4714). One major difference is said work used multiple  
215 media compositions, rather than one as in our study. Ten media conditions were used for both  
216 Tamworth and feral samples and are listed in supplemental table 1. Twenty-five colonies were  
217 picked at 48- and 72-hours post inoculation, for a total of 50 colonies per condition. In total,  
218 1000 colonies were selected from plates, of which 884 were successfully identified. Selective  
219 screens shifted the taxa retrieved (figures 3). Figure 3 depicts the number of isolates per media  
220 condition with a bar plot depicting the total number of isolates retrieved. *Lactobacillus sp.* was  
221 the most abundant organism retrieved (166 isolates) followed by *Escherichia coli* (86),  
222 *Lactobacillus mucosae* (74) and *Streptococcus hyointestinalis* (64). The top ten isolates cultured  
223 are listed in table 1. One case of selection completely changing plate diversity compared to plain  
224 media is that of heat shock treatment. As expected, many spore forming genera including  
225 *Bacillus* and *Clostridium* were only able to grow when the inoculum was heated to kill  
226 vegetative cells. The selective screens placed upon yBHI not only shifted the taxa retrieved from  
227 each plating condition as shown in Figure 3, but also shifted species richness and evenness  
228 (figure 4). The most diverse plating condition (Shannon Index) for both Tamworth and feral  
229 samples was obtained from plain yBHI : showing as a log-normal community distribution.  
230 Similar log-normal community structures are observed for BSM (Tamworth only), Erythromycin  
231 and heat shock treatments. Bile treatments and chlortetracycline exhibited strong selective  
232 pressure shown as geometric series in the species-rank abundance plots (figure 4). Most of the  
233 taxa retrieved from the bile condition were identified as Proteobacteria, indicating that the  
234 dosage of bile (1 g / L) was too high.

235           The culture strategy did not recapitulate the community in the inoculum as defined by  
236 metagenomics. In both Tamworth and feral samples, a high number of Firmicutes and

237 Proteobacteria were isolated, compared to the metagenomic sampling where Bacteroidetes was  
238 the most abundant phylum for both sources. If we disregard the bile conditions, which were  
239 dominated by Proteobacteria, yBHI clearly selects for common Firmicutes genera including:  
240 *Lactobacillus*, *Streptococcus*, and *Bacillus*. While the screens were successful in increasing the  
241 total number of species retrieved, no condition matched the inoculum in form. *Prevotella* for  
242 example, the most abundant genus in Tamworth pigs, was only retrieved seven times from 500  
243 colonies. Taken together, the strategy was successful in gathering many isolates that can grow on  
244 a common medium but failed in that the most abundant taxa were not retrieved in proportion to  
245 the inoculum.

#### 246 **Culturing captures genomic information not captured in metagenomics**

247 The sampling strategy employed did not recapitulate the inoculum community. However, one of  
248 the main reasons we chose to culture was that we believed rare taxa would provide information  
249 that would be lost to metagenomics. To examine this, we sequenced selected isolates and  
250 generated 81 high quality metagenomic bins (completeness > 85%, contamination < 5%). The  
251 phylogeny of the metagenomic bins and culture genomes was estimated (figure 5). Consistent  
252 with read taxonomy, many of the bins constructed from both Tamworth and feral samples were  
253 annotated to the phylum Bacteroidetes. The phyla Firmicutes, Proteobacteria and Actinobacteria  
254 were comprised almost entirely of isolate genomes. Isolate genomes not only populated clades of  
255 the tree missed by metagenomic bins, but provided genes not observed in metagenomic  
256 assemblies nor bins (figure 6). Open reading frames (ORF) were predicted from metagenomic  
257 assemblies, metagenomic bins, and culture isolate and were annotated against the KEGG  
258 database. Figure 6 shows the abundance (natural log) of KEGG homologues respective to the  
259 source of the ORF. Metagenomic bins contained less information than the metagenomic

260 assemblies. This is expected as the bins are derived from contigs in the assemblies and not all of  
261 the contigs will be gathered into bins. The isolates however provided KEGG homologues that  
262 were completely missed through culture-independent methods. Thus, culture and culture-  
263 independent methods can augment a microbiota analysis providing information that the other  
264 method cannot capture.

265

## 266 **Discussion**

267 Metagenomic and culture analysis revealed that despite the “organic” raising of the Tamworth  
268 pigs studied (ability to forage, no antimicrobials), their microbiome does not resemble that of  
269 feral pigs. While it is true that the two most abundant genera were the same for both sources,  
270 *Prevotella* and *Bacteroides*, the Tamworth pigs examined were rather homogenous in  
271 microbiome composition and were dominated by the genus *Prevotella*. An increase of *Prevotella*  
272 in human samples has been attributed to increase of dietary fiber (David, et al. 2014: 559-63, De  
273 Filippo, et al. 2010: 14691-6, Smith, et al. 2013: 548-54). It was noted that the Tamworth pigs  
274 were fed a high forage diet and were bedded on alfalfa straw. The high dietary fiber intake in  
275 Tamworth pigs may be responsible for the high levels of *Prevotella* and could account for the  
276 lower diversity values compared to feral pigs. The exact diet of the feral pigs is unknown, but it  
277 has been observed that a major portion of feral pig diet in Texas is composed of vegetation  
278 (Taylor and Hellgren 1997: 33-9). *Prevotella* has been identified as the most abundant genus in  
279 the swine microbiome to date (Holman, et al. 2017: e00004-17) and the sample size is simply too  
280 small to discern whether the large dominance of *Prevotella* in Tamworth pigs is breed or diet  
281 specific in nature.

282           Despite the high abundance of *Prevotella* in both Tamworth and feral pigs, and being the most  
283 abundant genus in pigs, the sampling strategy we employed only isolated seven *Prevotella* isolates from  
284 Tamworth samples (7/500, 1.4%) and no *Prevotella* was isolated from the feral inoculum. In contrast,  
285 several genera including *Lactobacillus*, *Escherchia*, *Streptococcous*, and *Bifidobacterium* were  
286 overrepresented in culture samples compared to metagenomic sequencing. Our culture results  
287 align with an early culture examination of the pig microbiome where the two most abundant  
288 isolates cultured were gram-positive cocci and *Lactobacillus* (Russell 1978: 187-93). Both our  
289 work and the earlier work relied upon complex media derived largely of peptone digests. As  
290 *Prevotella* is associated with an increase of dietary fiber, work will be needed to develop a  
291 defined media that is not based upon peptides such as yBHI. Culturomic techniques have largely  
292 focused on human fecal samples. Such studies have been wildly successful in culturing many  
293 bacteria that were previously thought to be “unculturable” (Browne, et al. 2016: 543, Lagier, et  
294 al. 2016: 16203). Many of the techniques rely upon anaerobic plating onto multiple media  
295 formulations, selection of single colonies, and identification. While the multiple media approach  
296 generates a higher number of taxa, one study isolated over 1,300 species (Lagier, et al. 2016:  
297 16203), creating multiple media formulations can be expensive and time-consuming.  
298 Additionally, bacteria isolated from different media may not grow together on a common media,  
299 forfeiting any combined in vitro experimentation. Given the importance of swine in global  
300 agriculture, coordinated culture efforts are needed to develop defined community models. Such  
301 reduced communities will help to uncover the impact of major ecological principles (drift,  
302 selection, speciation, dispersion) at work in the swine hindgut.

303           One of the original motivations for this work was to establish the microbiotas of pigs  
304 outside of traditional agricultural processes. Remarkably, it is the Tamworth pigs and not the

305 feral pigs that depart from the pig microbiota previously established (Holman, et al. 2017:  
306 e00004-17). The ratio of Firmicutes to Bacteroidetes is roughly equal in feral samples and that  
307 result aligns with agricultural animals. Tamworth at the phylum level is dominated by  
308 Bacteroidetes. Turning to the genus level, the top genus from both sources, *Prevotella*, aligns  
309 with the most abundant genus isolated from agricultural animals (Holman, et al. 2017: e00004-  
310 17). The genus *Bacteroides* is the second most abundant genus identified in both Tamworth and  
311 feral samples and is found in greater abundance than in conventionally-reared agricultural  
312 animals. The nearly identical distribution of *Bacteroides* between Tamworth and feral, and the  
313 discrepancy between conventionally-reared agricultural animals may indicate that traditional  
314 agricultural processes are negatively selecting for the genus. It has been shown that after  
315 weaning *Bacteroides* levels plummet in growing pigs and are supplanted by *Prevotella* (Frese, et  
316 al. 2015: 28-). Yet in our samples a stable population of *Bacteroides* has persisted. It should be  
317 noted that the discrepancy may be accounted for by differing identification methods,  
318 metagenomics vs amplicon sequencing, or could be an artifact of sampling size.

319         The Tamworth pigs harbored more AMR homologues than the feral pigs despite no  
320 antimicrobials being provided. It has been shown previously that organically raised pigs harbor  
321 significantly more chlortetracycline resistant isolates than feral pigs (Stanton, et al. 2011: 7167).  
322 The previous report and our findings indicate that feral pigs are not a significant reservoir of  
323 AMR genes. However, the presence of AMR genes in Tamworth pigs may be contributed to  
324 recombination. Previous work has established that AMR genes may cluster together with mobile  
325 genetic elements and that pigs typically harbor genes conferring resistance to agents not  
326 typically used on a particular farm (Johnson, et al. 2016: e02214-15).

327           Recent studies have proposed metagenomic binning as a culture-independent method to  
328 extract genomes from samples (Albertsen, et al. 2013: 533, Pasolli, et al. 2019: 649-62.e20,  
329 Tully, et al. 2018: 170203, Wang, et al. 2019: 48). However, one of the main pitfalls of  
330 metagenomic binning is that metagenomic assemblers struggle to assemble contigs of closely  
331 related taxa, especially if the organisms are found in low abundance (Ayling, et al. 2019). With  
332 knowledge now that strain-level variation occurs in species of the microbiome (Lloyd-Price, et  
333 al. 2017: 61-6), targeted culture efforts are needed to confirm that strain variation observed in  
334 metagenomic data is not simply due to assembler bias. Also, a large portion of genes were not  
335 annotated in metagenomic assemblies that were identified in culture isolates. We propose a  
336 wholistic approach where metagenomic sequencing coupled with high-throughput culture  
337 strategies can effectively cover the shortcomings of either technique, leading to a more complete  
338 method of microbiome sampling.

339

## 340 **Acknowledgements**

341 This work was in part supported by the grants from the South Dakota Governors Office of  
342 Economic Development (SD-GOED) and the United States Department of Agriculture (grant  
343 numbers SD00H532-14 and SD00R646-18) awarded to JS. We greatfully thank Mr. Tom  
344 Harrison, [Jeff Hopper](#) and [Brett Grogan](#) for their help in collecting feral pig gut microbiota  
345 samples. We are saddened by the untimely passing away of Tom Harrison during the course of  
346 this study. We dedicate this manuscript to his memory.



347

## 348 **References**

349

- 350 Albertsen M, Hugenholtz P, Skarshewski A *et al.* Genome sequences of rare, uncultured bacteria obtained  
351 by differential coverage binning of multiple metagenomes. *Nature Biotechnology* 2013;**31**: 533.
- 352 Alneberg J, Bjarnason BS, de Bruijn I *et al.* Binning metagenomic contigs by coverage and composition.  
353 *Nature Methods* 2014;**11**: 1144.
- 354 Aramaki T, Blanc-Mathieu R, Endo H *et al.* KofamKOALA: KEGG ortholog assignment based on profile  
355 HMM and adaptive score threshold. *bioRxiv* 2019, DOI 10.1101/602110: 602110.
- 356 Association BP. The Tamworth, n.d.
- 357 Auchtung JM, Robinson CD, Britton RA. Cultivation of stable, reproducible microbial communities from  
358 different fecal donors using minibioreactor arrays (MBRAs). *Microbiome* 2015;**3**: 42.
- 359 Ayling M, Clark MD, Leggett RM. New approaches for metagenome assembly with short reads.  
360 *Briefings in Bioinformatics* 2019, DOI 10.1093/bib/bbz020.
- 361 Browne HP, Forster SC, Anonye BO *et al.* Culturing of ‘unculturable’ human microbiota reveals novel  
362 taxa and extensive sporulation. *Nature* 2016;**533**: 543.
- 363 Byndloss MX, Olsan EE, Rivera-Chavez F *et al.* Microbiota-activated PPAR-gamma signaling inhibits  
364 dysbiotic Enterobacteriaceae expansion. *Science* 2017;**357**: 570-5.
- 365 David LA, Maurice CF, Carmody RN *et al.* Diet rapidly and reproducibly alters the human gut  
366 microbiome. *Nature* 2014;**505**: 559-63.
- 367 De Filippo C, Cavalieri D, Di Paola M *et al.* Impact of diet in shaping gut microbiota revealed by a  
368 comparative study in children from Europe and rural Africa. *Proc Natl Acad Sci U S A* 2010;**107**:  
369 14691-6.
- 370 Frese SA, Parker K, Calvert CC *et al.* Diet shapes the gut microbiome of pigs during nursing and  
371 weaning. *Microbiome* 2015;**3**: 28-.
- 372 Goodman AL, Kallstrom G, Faith JJ *et al.* Extensive personal human gut microbiota culture collections  
373 characterized and manipulated in gnotobiotic mice. *Proc Natl Acad Sci U S A* 2011;**108**: 6252-7.
- 374 Hedegaard CJ, Strube ML, Hansen MB *et al.* Natural Pig Plasma Immunoglobulins Have Anti-Bacterial  
375 Effects: Potential for Use as Feed Supplement for Treatment of Intestinal Infections in Pigs.  
376 *PLOS ONE* 2016;**11**: e0147373.
- 377 Holman DB, Brunelle BW, Trachsel J *et al.* Meta-analysis To Define a Core Microbiota in the Swine Gut.  
378 *mSystems* 2017;**2**: e00004-17.
- 379 Hyatt D, Chen G-L, Locascio PF *et al.* Prodigal: prokaryotic gene recognition and translation initiation  
380 site identification. *BMC bioinformatics* 2010;**11**: 119-.
- 381 Jing L, Hou Y, Wu H *et al.* Transcriptome analysis of mRNA and miRNA in skeletal muscle indicates an  
382 important network for differential Residual Feed Intake in pigs. *Scientific Reports* 2015;**5**: 11953.
- 383 Johnson TA, Stedtfeld RD, Wang Q *et al.* Clusters of Antibiotic Resistance Genes Enriched Together  
384 Stay Together in Swine Agriculture. *mBio* 2016;**7**: e02214-15.
- 385 Kang D, Li F, Kirton ES *et al.* MetaBAT 2: an adaptive binning algorithm for robust and efficient  
386 genome reconstruction from metagenome assemblies. *PeerJ Preprints* 2019;**7**: e27522v1.
- 387 Lagier J-C, Khelaifia S, Alou MT *et al.* Culture of previously uncultured members of the human gut  
388 microbiota by culturomics. *Nature microbiology* 2016;**1**: 16203.
- 389 Lloyd-Price J, Mahurkar A, Rahnavard G *et al.* Strains, functions and dynamics in the expanded Human  
390 Microbiome Project. *Nature* 2017;**550**: 61-6.
- 391 Menzel P, Ng KL, Krogh A. Fast and sensitive taxonomic classification for metagenomics with Kaiju.  
392 *Nature Communications* 2016;**7**: 11257.

- 393 Metzler-Zebeli BU, Schmitz-Esser S, Mann E *et al.* Adaptation of the Cecal Bacterial Microbiome of  
394 Growing Pigs in Response to Resistant Starch Type 4. *Applied and Environmental Microbiology*  
395 2015;**81**: 8489.
- 396 Na S-I, Kim YO, Yoon S-H *et al.* UBCG: Up-to-date bacterial core gene set and pipeline for  
397 phylogenomic tree reconstruction. *Journal of Microbiology* 2018;**56**: 280-5.
- 398 Nurk S, Meleshko D, Korobeynikov A *et al.* metaSPAdes: a new versatile metagenomic assembler.  
399 *Genome research* 2017;**27**: 824-34.
- 400 Ondov BD, Treangen TJ, Melsted P *et al.* Mash: fast genome and metagenome distance estimation using  
401 MinHash. *Genome Biology* 2016;**17**: 132.
- 402 Parks DH, Imelfort M, Skennerton CT *et al.* CheckM: assessing the quality of microbial genomes  
403 recovered from isolates, single cells, and metagenomes. *Genome research* 2015;**25**: 1043-55.
- 404 Pasolli E, Asnicar F, Manara S *et al.* Extensive Unexplored Human Microbiome Diversity Revealed by  
405 Over 150,000 Genomes from Metagenomes Spanning Age, Geography, and Lifestyle. *Cell*  
406 2019;**176**: 649-62.e20.
- 407 Piewngam P, Zheng Y, Nguyen TH *et al.* Pathogen elimination by probiotic *Bacillus* via signalling  
408 interference. *Nature* 2018;**562**: 532-7.
- 409 R Core Team. R: A Language and Environment for Statistical Computing, 2019.
- 410 Rettedal EA, Gumpert H, Sommer MOA. Cultivation-based multiplex phenotyping of human gut  
411 microbiota allows targeted recovery of previously uncultured bacteria. *Nature Communications*  
412 2014;**5**: 4714.
- 413 Russell EG. Types and Distribution of Anaerobic Bacteria in the Large Intestine of Pigs. *Applied and*  
414 *Environmental Microbiology* 1978;**37**: 187-93.
- 415 Seemann T. ABRicate: 0.8.0 Edition. GitHub, 2018.
- 416 Siemann E, Carrillo JA, Gabler CA *et al.* Experimental test of the impacts of feral hogs on forest  
417 dynamics and processes in the southeastern US. *Forest Ecology and Management* 2009;**258**: 546-  
418 53.
- 419 Singh KM, Shah TM, Reddy B *et al.* Taxonomic and gene-centric metagenomics of the fecal microbiome  
420 of low and high feed conversion ratio (FCR) broilers. *Journal of Applied Genetics* 2014;**55**: 145-  
421 54.
- 422 Smith MI, Yatsunenko T, Manary MJ *et al.* Gut microbiomes of Malawian twin pairs discordant for  
423 kwashiorkor. *Science* 2013;**339**: 548-54.
- 424 Smits SA, Leach J, Sonnenburg ED *et al.* Seasonal cycling in the gut microbiome of the Hadza hunter-  
425 gatherers of Tanzania. *Science* 2017;**357**: 802.
- 426 Stamatakis A. RAxML version 8: a tool for phylogenetic analysis and post-analysis of large phylogenies.  
427 *Bioinformatics (Oxford, England)* 2014;**30**: 1312-3.
- 428 Stanton TB, Humphrey SB, Stoffregen WC. Chlortetracycline-Resistant Intestinal Bacteria in Organically  
429 Raised and Feral Swine. *Applied and Environmental Microbiology* 2011;**77**: 7167.
- 430 Taylor RB, Hellgren EC. Diet of Feral Hogs in the Western South Texas Plains. *The Southwestern*  
431 *Naturalist* 1997;**42**: 33-9.
- 432 Tully BJ, Graham ED, Heidelberg JF. The reconstruction of 2,631 draft metagenome-assembled genomes  
433 from the global oceans. *Scientific Data* 2018;**5**: 170203.
- 434 Uritskiy GV, DiRuggiero J, Taylor J. MetaWRAP—a flexible pipeline for genome-resolved metagenomic  
435 data analysis. *Microbiome* 2018;**6**: 158.
- 436 USDA. History of Feral Swine in the Americas: USDA, 2018.
- 437 Wang W, Hu H, Zijlstra RT *et al.* Metagenomic reconstructions of gut microbial metabolism in weanling  
438 pigs. *Microbiome* 2019;**7**: 48.
- 439 Wick RR, Judd LM, Gorrie CL *et al.* Unicycler: Resolving bacterial genome assemblies from short and  
440 long sequencing reads. *PLOS Computational Biology* 2017;**13**: e1005595.
- 441 Wu YW, Simmons BA, Singer SW. MaxBin 2.0: an automated binning algorithm to recover genomes  
442 from multiple metagenomic datasets. *Bioinformatics* 2016;**32**: 605-7.

443

444

445

446

447

448

449

450 **Figures**

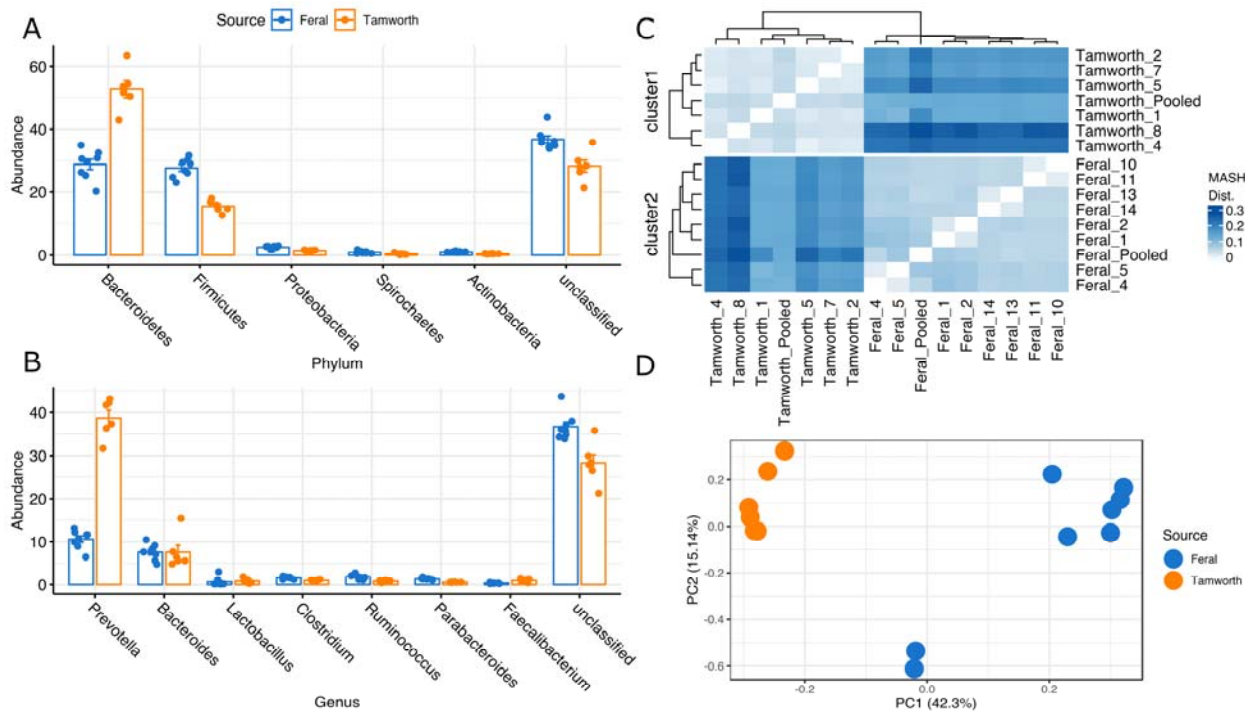

451

452 **Fig 1. Metagenomic analysis of feral and Tamworth colon and cecum samples. (A)(B)**

453 Relative abundance of major phyla and genera annotated from sequencing reads respective to

454 isolation source. (C) Triangle matrix depicting the MASH distance between feral and Tamworth

455 samples. Clusters 1 and 2 are defined by kmeans clustering.

456

457

458

459

460

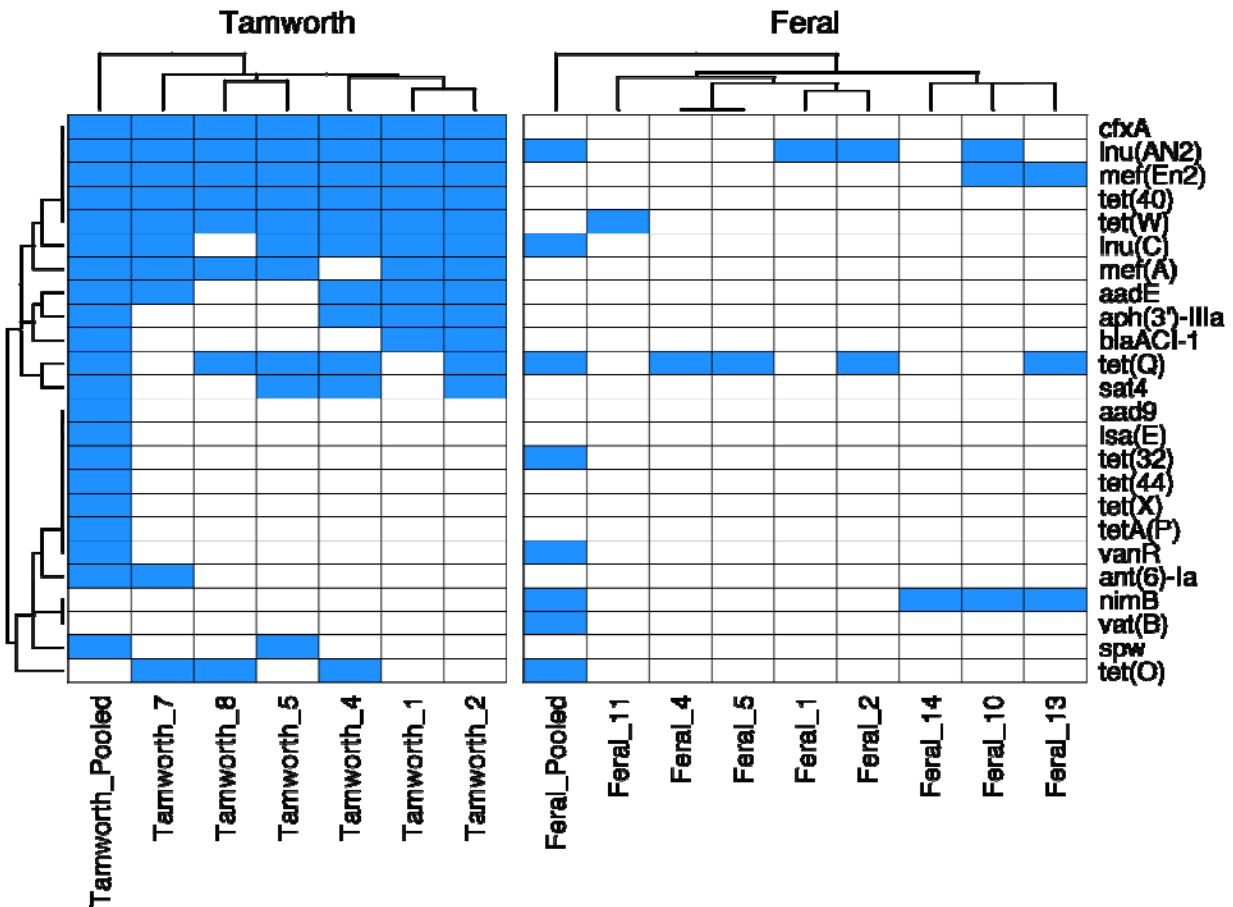

461

462 **Fig 2. Antimicrobial resistance (AMR) homologues annotated from metagenomic samples.**

463 Columns depict individual samples and rows correspond to AMR homologues. Blue color  
464 depicts the presence and white color corresponds to absence. AMR homologues were considered  
465 present if the coverage value was greater than 90% and a percent homology greater than 70%.

466

467

468

469

470

471

472  
473  
474  
475

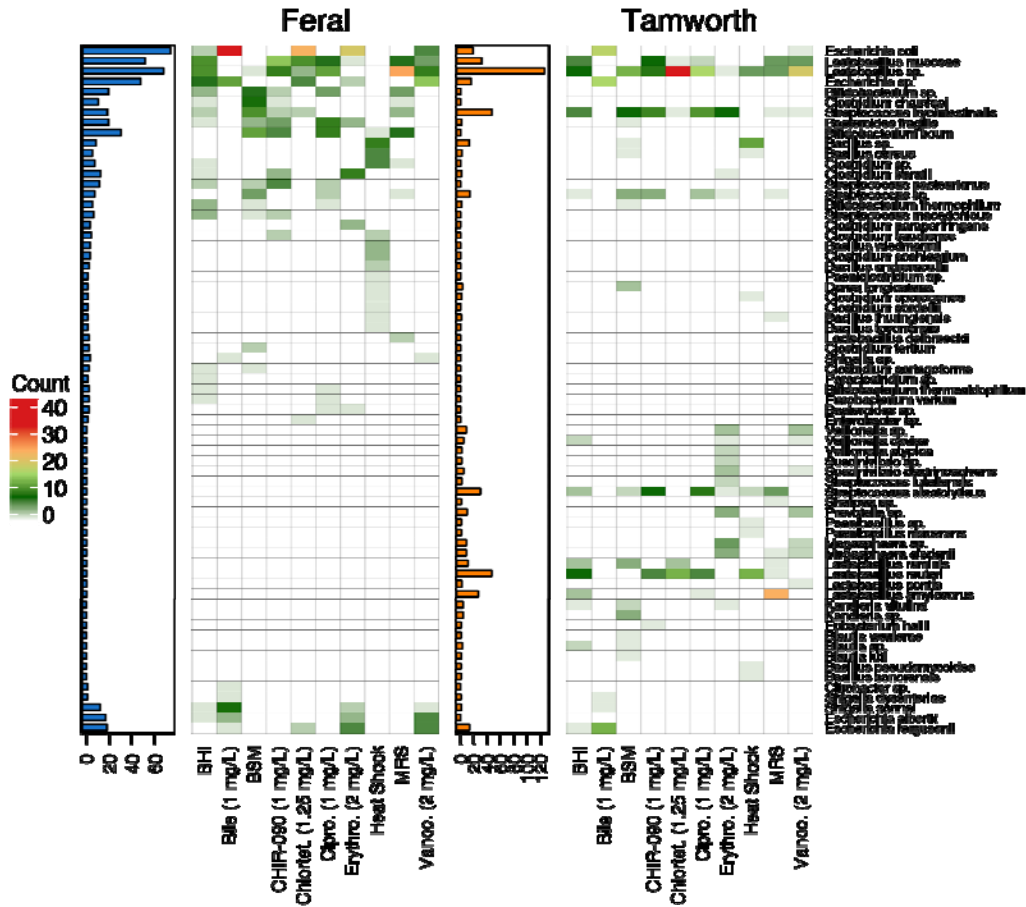

476  
477  
478  
479  
480  
481  
482  
483

**Fig 3. Bacteria isolated from various media conditions.** Columns represent individual media conditions and row correspond to bacterial taxa retrieved, cells are colored respective to the number of isolates cultured per media condition. The corresponding bar plot to the left of the matrices shows the total number of isolates retrieved per isolation source.

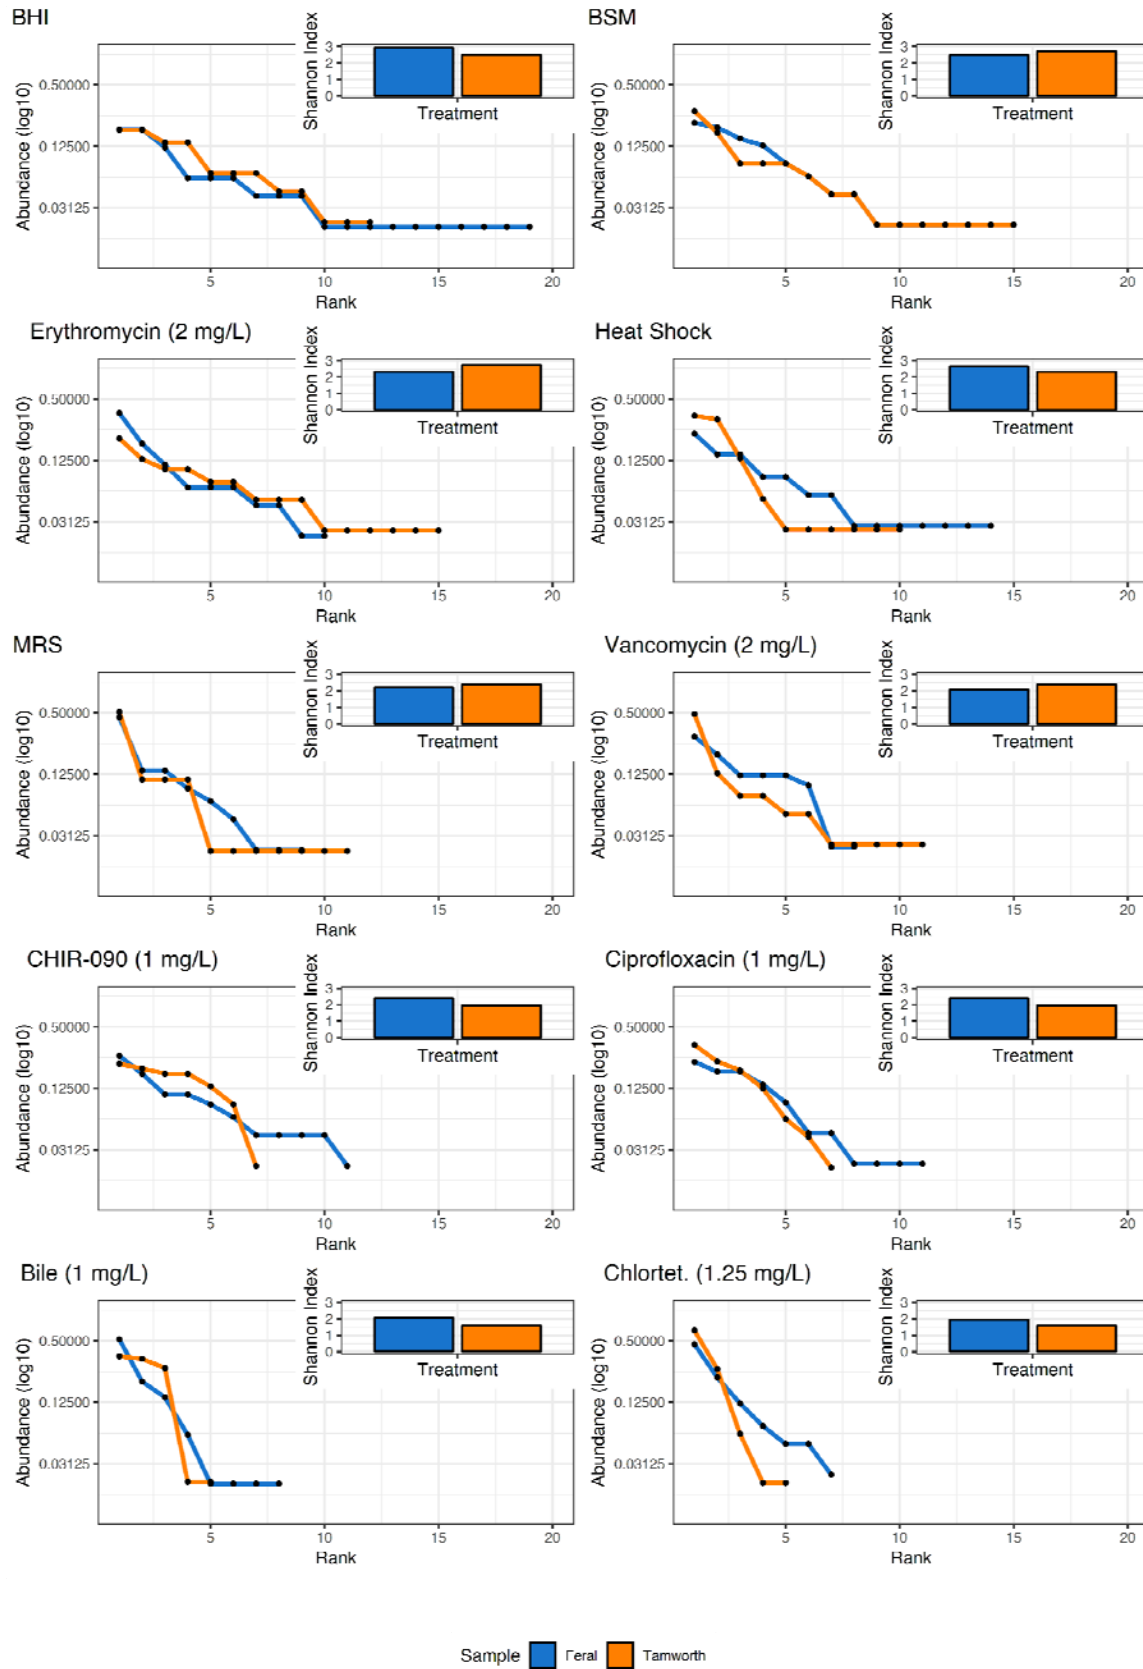



485 **Fig 4. Rank abundance curves of the various media conditions.** The community evenness of  
486 the various media conditions is shown respective to the isolation source. The inlay plot depicts  
487 the Shannon Index respective to the isolation source.

488

489

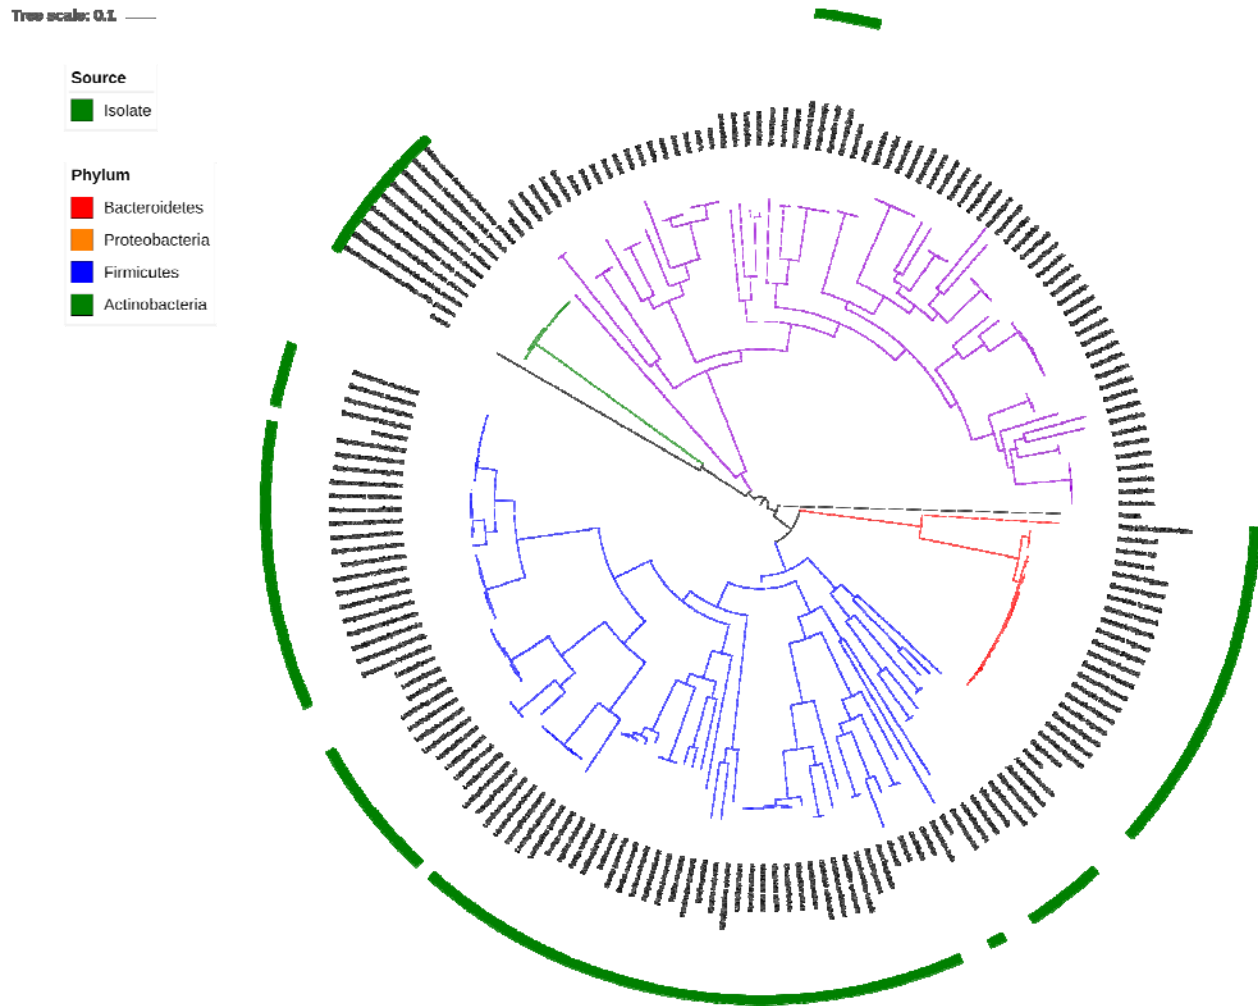

490

491

492 **Fig 5. Maximum-likelihood tree of metagenomic bins and culture genomes.** Tree was  
493 constructed from a nucleotide alignment of 92 single-marker genes. General time reversible  
494 (GTR) was chosen as the substitution model in tree construction.

495

496

497

498

499

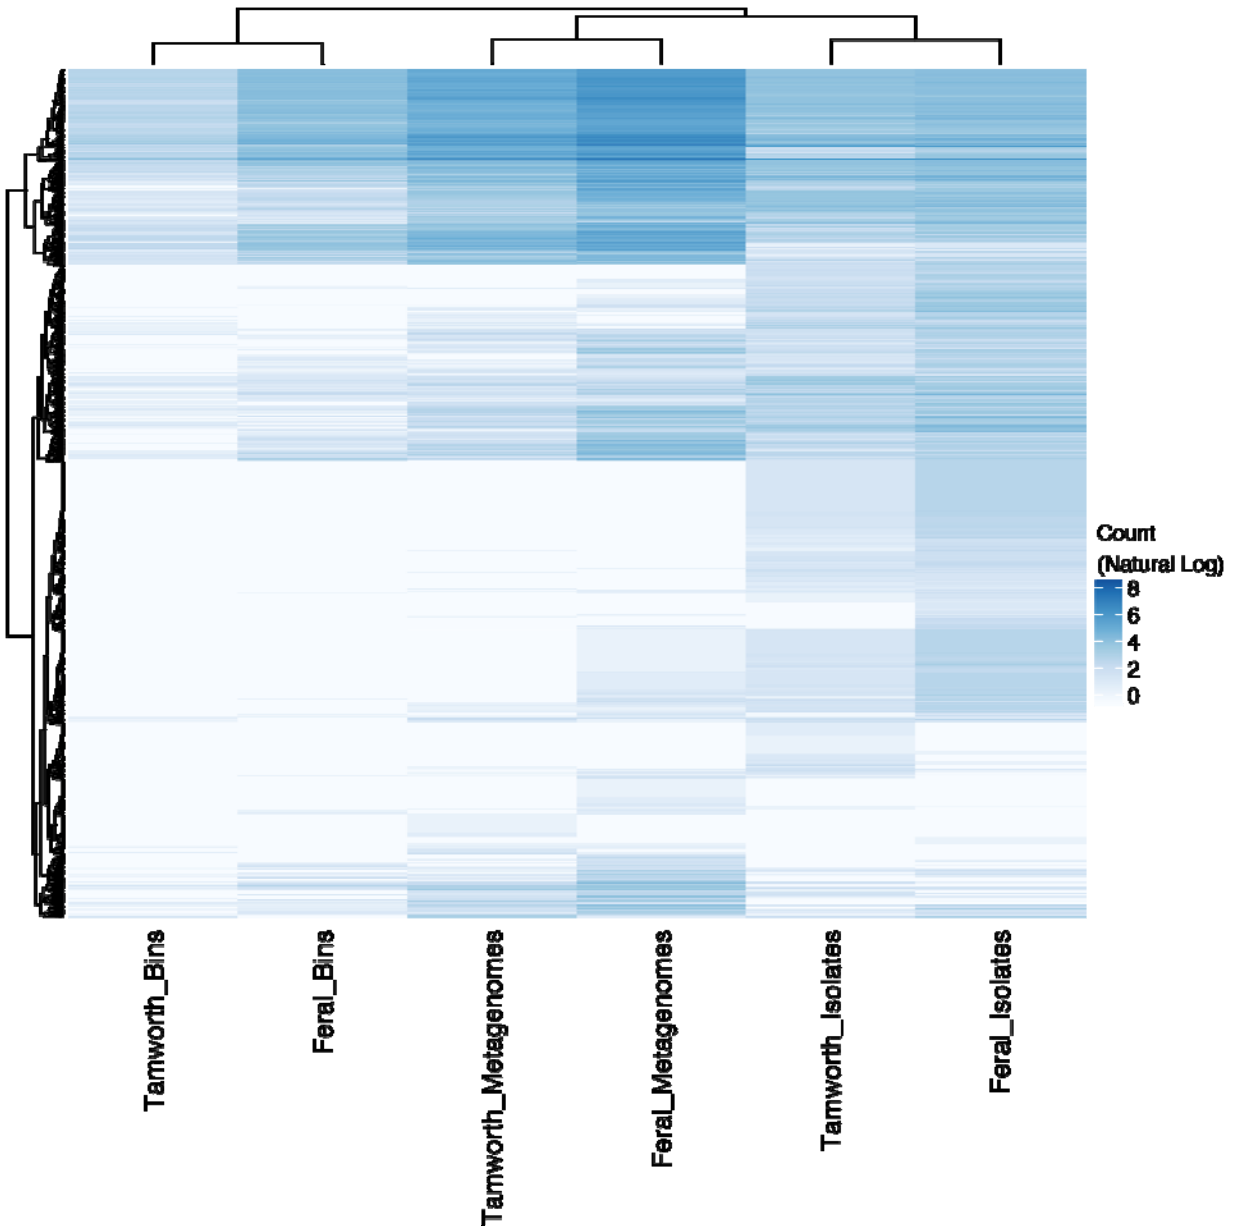

500

501 **Fig 6. KEGG annotation of open frames from metagenomic assemblies, bins, and culture**  
502 **genomes.** Rows and columns are clustered using an average linkage method. KEGG annotations  
503 counts are represented as the natural log to increase the clarity of the figure.

504

505

506
